# Supplementary material for: In vitro and in vivo activity of a new unsymmetrical dinuclear copper complex containing a derivative ligand of 1,4,7-triazacyclononane: catalytic promiscuity of [Cu2(L)Cl3]
Source: Royal Society of Chemistry journal article supplement (doi:10.1039/c3dt33046j), 2013-01-01
Supplement: c3dt33046j.pdf [file c3dt33046j.pdf]

## Electronic Supporting Information

### ***In Vitro* and *In Vivo* Activity of a New Unsymmetrical Dinuclear Copper Complex Containing a Derivative Ligand of 1,4,7-triazacyclononane: Catalytic Promiscuity of [Cu<sub>2</sub>(L)Cl<sub>3</sub>]**

**Vicente R. de Almeida,<sup>\*a</sup> Fernando R. Xavier,<sup>b</sup> Renata E.H.M.B.Osório,<sup>a</sup> Luiza M. Bessa,<sup>a</sup>  
Eduardo L. Schilling,<sup>a</sup> Thiago G. Costa,<sup>a</sup> Tiago Bortolotto,<sup>c</sup> Angélica Cavalett,<sup>c</sup> Frederico  
A. V. Castro,<sup>d</sup> Felipe Vilhena,<sup>e</sup> Odivaldo C. Alves,<sup>e</sup> Hernán Terenzi,<sup>c</sup> Elis C. A. Eleutherio,<sup>d</sup>  
Marcos D. Pereira,<sup>d</sup> Wolfgang Haase,<sup>f</sup> Zbigniew Tomkowicz,<sup>g</sup> Bruno Szpoganicz,<sup>a</sup>  
Adailton J. Bortoluzzi<sup>a</sup> and Ademir Neves.<sup>\*a</sup>**

<sup>a</sup>*Departamento de Química, Universidade Federal de Santa Catarina, Florianópolis – SC 88040-900, Brazil; +55(48)3721-9962; [vicentebra@hotmail.com](mailto:vicentebra@hotmail.com), [ademir.neves@ufsc.br](mailto:ademir.neves@ufsc.br)*

<sup>b</sup>*Departamento de Química, Universidade do Estado de Santa Catarina, Joinville - SC 89219-710, Brazil;*

<sup>c</sup>*Centro de Biologia Molecular Estrutural, Universidade Federal de Santa Catarina, Florianópolis – SC 88040-900, Brazil;*

<sup>d</sup>*Departamento de Bioquímica, Instituto de Química, Universidade Federal do Rio de Janeiro, Rio de Janeiro – RJ 21949-900, Brazil;*

<sup>e</sup>*Coordenação de Física Aplicada, Centro Brasileiro de Pesquisas Físicas, Rio de Janeiro – RJ, 22290-180, Brazil;*

<sup>f</sup>*Institut für Physikalische Chemie, Technische Universität Darmstadt, Petersenstraße 20, D-64287-Darmstadt, Germany;*

<sup>g</sup>*Institute of Physics, Reymonta 4, Jagiellonian University, PL-30-059 Krakow, Poland.*

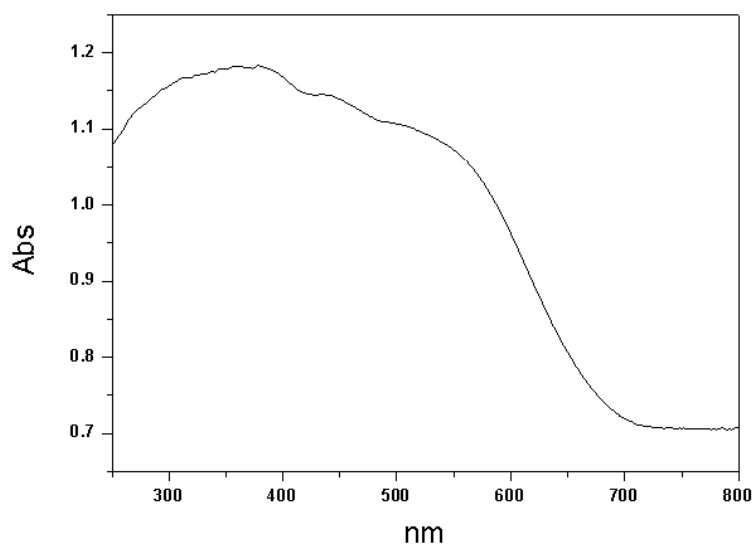

**Fig S1** Diffuse reflectance electronic spectrum of complex **1** crystals dispersed in KBr pellet.

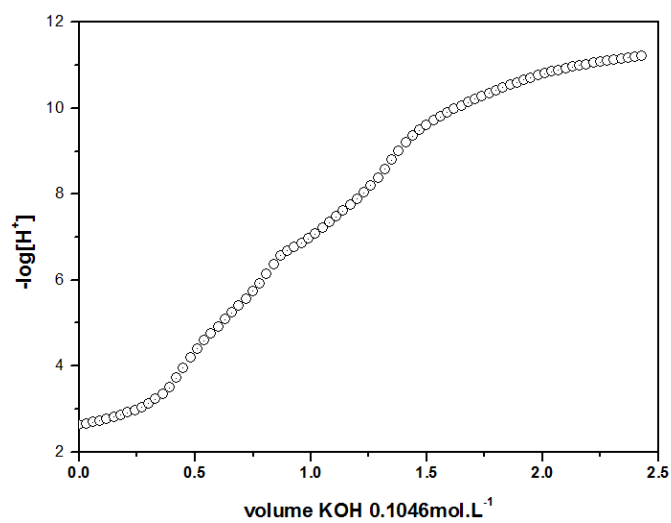

**Fig S2** Potentiometric titration curve of complex **1**.

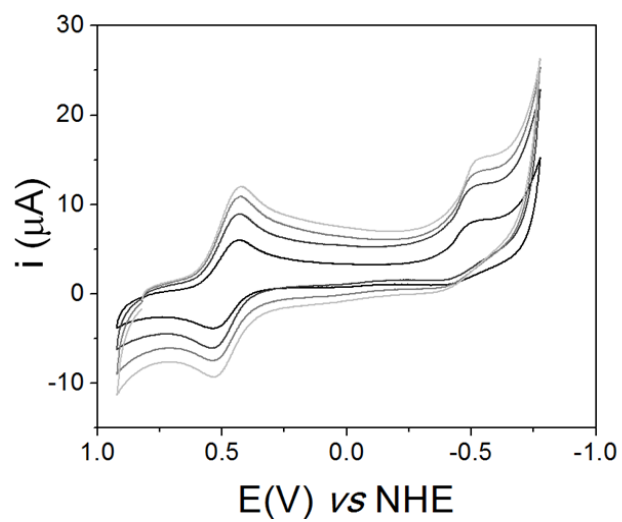

**Fig S3** CV voltammogram of **1** in CH<sub>3</sub>CN. Supporting electrolyte *n*-Bu<sub>4</sub>NPF<sub>6</sub> 0.1 mol.L<sup>-1</sup>, electrodes: glassy-carbon (working), platinum wire (auxiliary) and Ag/Ag<sup>+</sup> (reference), internal standard ferrocene ( $E^0 = 400$  mV vs NHE)

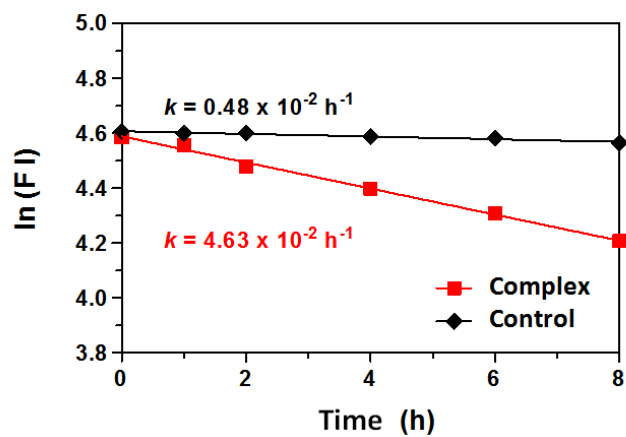

**Fig S4** Kinetics of supercoiled DNA cleavage by complex at  $0.5 \text{ mmolL}^{-1}$  at  $37 \text{ }^{\circ}\text{C}$  in MES ( $10 \text{ mmolL}^{-1}$ , pH 6.0).
